# Supplementary material
Source: ML conference proceedings conference paper supplement (https://openaccess.thecvf.com/content/CVPR2023/html/Jiao_Learning_Attribute_and_CVPR_2023_paper.html)
Supplement: Supplementary file 1 [file Jiao_Learning_Attribute_and_CVPR_2023_supplemental.pdf]

# Learning Attribute and Class-Specific Representation Duet for Fine-grained Fashion Analysis

Yang Jiao  
Amazon

jaoyan@amazon.com

Yan Gao, Jingjing Meng, Jin Shang, Yi Sun  
Amazon

{yanngao, ajmeng, imjshang, yisun}@amazon.com

## Supplementary Materials

### 1. Hyperparameter Sensitivity Analysis

(1) We have conducted a sensitivity study on the threshold  $\gamma$  (Table 1). As can be seen, our model is not sensitive to  $\gamma$  and consistently outperforms the baselines. Although we present results for  $\gamma=0.8$  in the paper, in fact  $\gamma=0.925$  gives the best MAP@all. It also shows that our results are not handpicked. (2) For  $w_p$ , i.e., the weight on the positive labels, we use the average ratio of negative and positive labels among samples in the dataset.

| models                        | $\gamma$ | MAP@all      | MAP@100      | Recall@100   |
|-------------------------------|----------|--------------|--------------|--------------|
| <i>ASEN</i> [19]              | -        | 12.33        | 20.60        | 5.10         |
| <i>ASEN<sub>v2</sub></i> [19] | -        | 12.51        | 20.55        | 4.99         |
| <i>ASEN++</i> [6]             | -        | 12.74        | 20.79        | 5.21         |
| <i>MODC</i> [14]              | -        | 12.78        | 22.21        | 6.06         |
| <i>M3-Net</i>                 | 0.500    | 20.78        | 32.62        | 12.03        |
| <i>M3-Net</i>                 | 0.600    | 21.11        | 33.26        | 12.25        |
| <i>M3-Net</i>                 | 0.700    | 21.42        | 34.01        | 12.50        |
| <i>M3-Net</i>                 | 0.800    | 21.78        | 35.08        | 12.88        |
| <i>M3-Net</i>                 | 0.900    | 22.14        | 37.07        | 13.42        |
| <i>M3-Net</i>                 | 0.925    | <b>22.17</b> | 38.01        | 13.60        |
| <i>M3-Net</i>                 | 0.950    | 22.13        | 39.45        | 13.82        |
| <i>M3-Net</i>                 | 0.975    | 21.58        | <b>42.01</b> | <b>13.83</b> |

Table 1. Sensitivity study of  $\gamma$  for M3-Net. Study is on DeepFashion with comparison with baselines.

### 2. More Experimental results

Table 2, Table 3, Table 4 presents MAP@100 on each attribute in the three benchmark datasets: DeepFashion, FashionAI, and DARN. According to the tables, M3-Net consistently outperforms other methods in the top 100 retrieval performance on most attributes. The best performing method on each dataset are underlined in **bold**.

### 3. More Results of Fine-grained Fashion Retrieval with M3-Net

In Figure 1, we present more results of multi-label fine-grained fashion retrieval on DeepFashion.

| Model                        | DeepFashion, MAP@100 |              |              |              |              |              |
|------------------------------|----------------------|--------------|--------------|--------------|--------------|--------------|
|                              | Attribute            | texture      | fabric       | shape        | part         | style        |
| <i>ASEN</i> [3]              | 29.70                | 21.16        | 25.06        | 15.38        | 10.20        | 20.60        |
| <i>ASEN<sub>v2</sub></i> [3] | 30.24                | 20.00        | 24.62        | 15.29        | 10.13        | 20.55        |
| <i>ASEN++</i> [1]            | 30.25                | 20.21        | 25.22        | 15.41        | 10.34        | 20.79        |
| <i>MODC</i> [2]              | 32.42                | 21.96        | 26.55        | 15.81        | 11.50        | 22.21        |
| <i>M3-Net<sub>a</sub></i>    | 35.71                | 27.94        | 32.63        | 23.82        | 18.22        | 28.14        |
| <i>M3-Net<sub>c</sub></i>    | 39.15                | 29.61        | 34.67        | 26.07        | 21.41        | 30.58        |
| <i>M3-Net</i>                | <b>43.47</b>         | <b>33.27</b> | <b>41.71</b> | <b>31.15</b> | <b>23.87</b> | <b>35.08</b> |

Table 2. Overall performance comparison on all attributes in the multi-label dataset, DeepFashion.

## References

- [1] Jianfeng Dong, Zhe Ma, Xiaofeng Mao, Xun Yang, Yuan He, Richang Hong, and Shouling Ji. Fine-grained fashion similarity prediction by attribute-specific embedding learning. *arXiv preprint arXiv:2104.02429*, 2021.
- [2] Yang Jiao, Ning Xie, Yan Gao, Chien-Chih Wang, and Yi Sun. Fine-grained fashion representation learning by online deep clustering. In *European Conference on Computer Vision*, pages 19–35. Springer, 2022.
- [3] Zhe Ma, Jianfeng Dong, Zhongzi Long, Yao Zhang, Yuan He, Hui Xue, and Shouling Ji. Fine-grained fashion similarity learning by attribute-specific embedding network. In *Proceedings of the AAAI Conference on Artificial Intelligence*, pages 11741–11748, 2020.

| Model                        | FashionAI, MAP@100 |               |              |              |               |              |                 |              |              |
|------------------------------|--------------------|---------------|--------------|--------------|---------------|--------------|-----------------|--------------|--------------|
|                              | skirt length       | sleeve length | coat length  | pant length  | collar design | lapel design | neckline design | neck design  | overall      |
| <i>ASEN</i> [3]              | 72.20              | 56.74         | 58.87        | 70.48        | 75.43         | 68.57        | 61.82           | 63.73        | 64.70        |
| <i>ASEN<sub>v2</sub></i> [3] | 72.57              | 61.33         | 60.14        | 71.67        | 75.70         | 71.82        | 69.42           | 66.48        | 67.85        |
| <i>ASEN++</i> [1]            | 73.65              | 63.90         | 63.90        | 74           | 76.81         | 71.29        | 73.82           | 72.53        | 70.62        |
| <i>MODC</i> [2]              | 81.53              | 73.88         | 76.23        | 82.10        | 84.52         | 80.86        | 84.18           | 82.39        | 80.29        |
| <i>M3-Net<sub>a</sub></i>    | 80.89              | 78.54         | 74.25        | 84.00        | 85.73         | 84.70        | 85.84           | 80.52        | 81.57        |
| <i>M3-Net<sub>c</sub></i>    | 84.19              | 77.05         | 78.35        | 84.94        | 87.35         | 86.46        | 84.80           | 81.55        | 82.58        |
| <i>M3-Net</i>                | <b>87.57</b>       | <b>84.72</b>  | <b>82.77</b> | <b>88.45</b> | <b>89.48</b>  | <b>90.49</b> | <b>89.13</b>    | <b>85.62</b> | <b>87.04</b> |

Table 3. Overall performance comparison on all attributes in the single-label dataset, FashionAI.

| Model                        | DARN, MAP@100    |                |               |                |                 |               |              |               |              |              |
|------------------------------|------------------|----------------|---------------|----------------|-----------------|---------------|--------------|---------------|--------------|--------------|
|                              | clothes category | clothes button | clothes color | clothes length | clothes pattern | clothes shape | collar shape | sleeve length | sleeve shape | overall      |
| <i>ASEN</i> [3]              | 42.57            | 53.58          | 58.47         | 62.62          | 61.91           | 65.04         | 42.43        | 80.71         | 62.25        | 58.72        |
| <i>ASEN<sub>v2</sub></i> [3] | 43.16            | 55.87          | 56.97         | 65.23          | 62.33           | 64.78         | 44.03        | 83.08         | 62.86        | 59.66        |
| <i>ASEN++</i> [1]            | 45.12            | 56.40          | 57.71         | 65.22          | 65.08           | 65.81         | 45.47        | 85.45         | 64.93        | 61.09        |
| <i>MODC</i> [2]              | 59.20            | 72.08          | 67.96         | 74.56          | 74.43           | 4.59          | 61.66        | 91.14         | 75.07        | 72.16        |
| <i>M3-Net<sub>a</sub></i>    | 67.96            | 78.52          | 76.35         | 79.09          | 79.94           | 83.16         | 71.47        | 90.94         | 75.64        | 78.12        |
| <i>M3-Net<sub>c</sub></i>    | <b>70.46</b>     | 81.00          | 76.57         | 84.24          | 83.22           | 87.03         | 76.87        | <b>94.32</b>  | 79.38        | 81.46        |
| <i>M3-Net</i>                | 70.15            | <b>83.01</b>   | <b>79.84</b>  | <b>86.10</b>   | <b>83.84</b>    | <b>87.83</b>  | <b>78.67</b> | 93.81         | <b>80.85</b> | <b>82.69</b> |

Table 4. Overall performance comparison on all attributes in the single-label dataset, DARN.

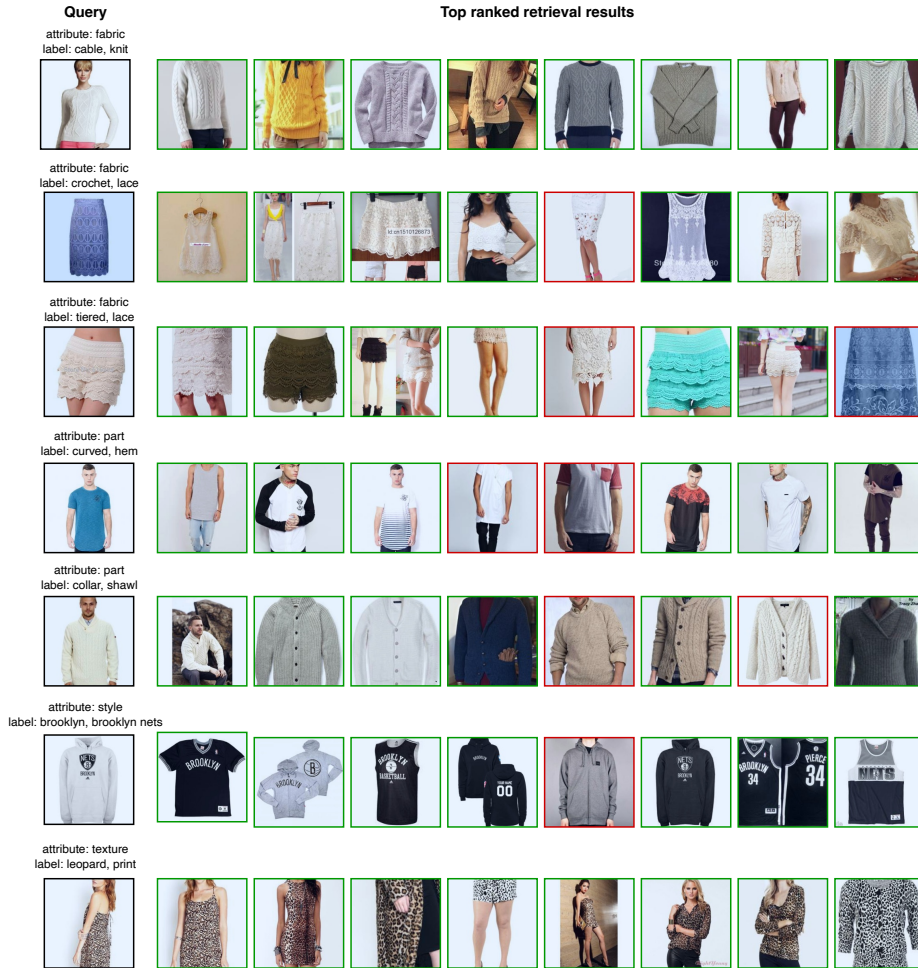

Figure 1. Examples of multi-label fashion retrieval. The retrieval is conducted by M3-Net on DeepFashion test split. Green shows true positives retrieved, while red shows false positives retrieved. Best viewed in color on a computer screen.
